# Supplementary material
Source: PubMed Central journal article supplement (PMC4573825)

Dual PTM-PTN  
Overproducing Mutants

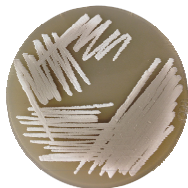

SB12030  
( $\Delta ptmR1 \Delta ptmO4$ )

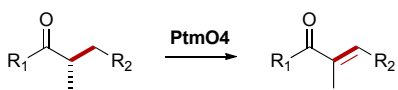

$R_1 = \text{SCoA or OH}; R_2 = \text{M}$

$R_1 = \text{SCoA or OH}; R_2 = \text{N}$

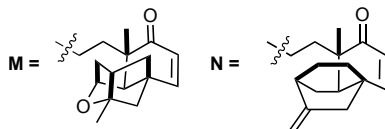

Supplement: NIHMS698825-supplement-Graphical_Abstract_image.pdf [file NIHMS698825-supplement-Graphical_Abstract_image.pdf]
